# Supplementary material for: A NiFe PBA/AuNPs nanocomposite sensitive immunosensor for electrochemical detection of PSA
Source: Royal Society of Chemistry journal article supplement (doi:10.1039/d3ay02184j), 2024-01-01
Supplement: d3ay02184j1.pdf [file d3ay02184j1.pdf]

## Supplementary Information

### NiFe PBA/AuNPs nanocomposite sensitive immunosensor for electrochemical detection of PSA

Xin Hua,<sup>†a</sup> Tongxiao Zhao,<sup>†a</sup> Xueqin Gui<sup>b</sup>, and Baokang Jin<sup>\*a</sup>

<sup>a</sup>Department of Chemistry, Anhui University, Hefei 230601, China.

Fig S1

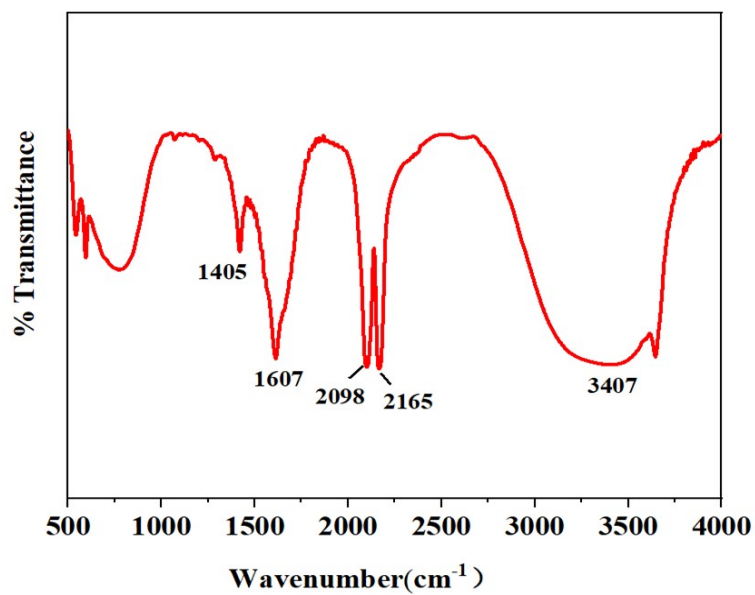

Fig. S1 FTIR spectra of NiFe PBA/AuNPs.

Fig S2

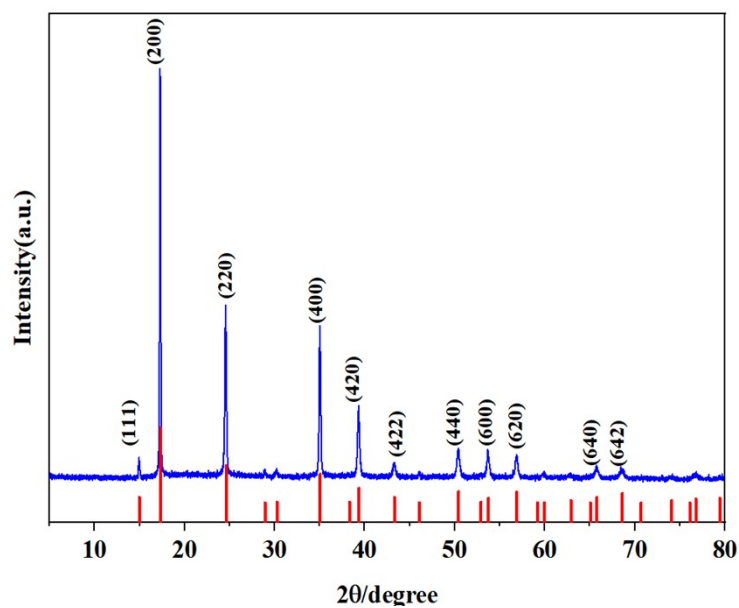

Fig. S2 XRD pattern of NiFe PBA/AuNPs.

Fig S3

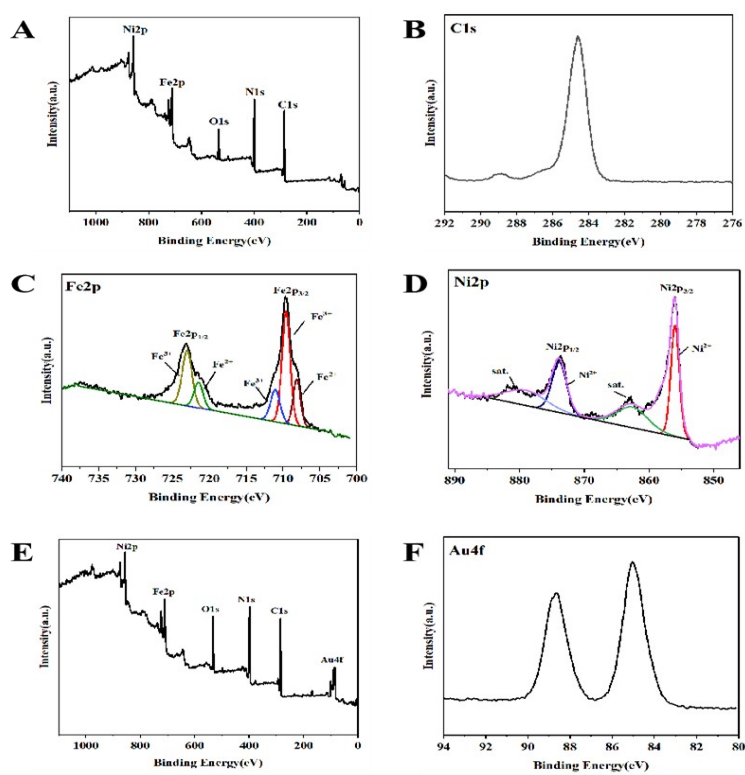

Fig. S3 XPS spectra of NiFe PBA: (A) full scan; (B) C1s; (C) Fe2p; (D) Ni2p.

XPS spectra of NiFe PBA/AuNPs:(E) full scan; (F)Au4f

**Fig S4**

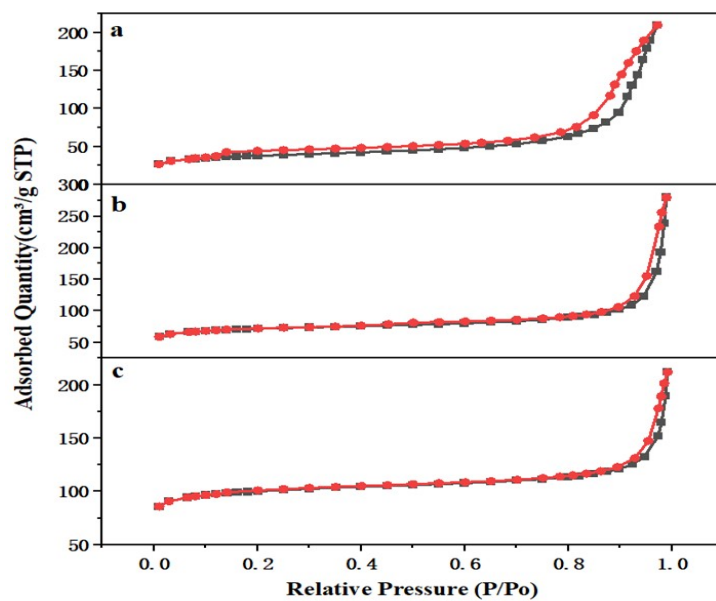

**Fig. S4**  $N_2$  adsorption-desorption isotherms of (a) CoFe PBA (b) MnFe PBA and (c) NiFe PBA

**Fig S5**

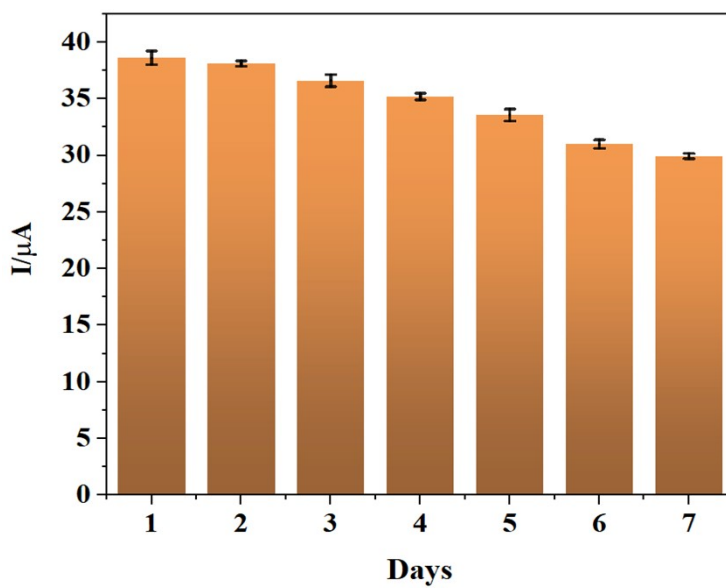

**Fig. S5** Stability test of prepared biosensor

**Table S1**

Reproducibility test of prepared biosensor (n=5)

| Sample | Current response ( $\mu\text{A}$ ) | Average ( $\mu\text{A}$ ) | RSD (%) |
|--------|------------------------------------|---------------------------|---------|
| 1      | 30.64                              |                           |         |
| 2      | 30.16                              |                           |         |
| 3      | 31.22                              | 30.85                     | 2.92    |
| 4      | 30.01                              |                           |         |
| 5      | 32.22                              |                           |         |
